# Supplementary material for: Development and characterization of type I interferon receptor knockout sheep: A model for viral immunology and reproductive signaling
Source: PubMed Central journal article supplement (PMC9556006; doi:10.3389/fgene.2022.986316), 2022-09-14
Supplement: Table1.pdf [file Table1.pdf]

**Supplemental Table 1: Primers for off-target analysis.**

| <b>Off target</b> | <b>Forward (5'→3')</b>  | <b>Reverse (5'→3')</b>  | <b>TM (°C)</b> | <b>Product size (bp)</b> |
|-------------------|-------------------------|-------------------------|----------------|--------------------------|
| OFT1              | GACTGAGAGAGGAGAGTCAGAC  | GTCTGCAGGAACTTCTCAACA   | 60.8           | 627                      |
| OFT2              | GTCTGCAGGAACTTCTCAACA   | ATGTGACTAGCTGGATCCAAGT  | 60.8           | 685                      |
| OFT3              | AAGGCATTCTTCTGAGCATG    | GATTTCTCAAGAGGCAGGTCAG  | 62.7           | 499                      |
| OFT4              | GGCTGTTGTATGGCATCACATA  | TGAGCCACCAGGATTAATGAGA  | 60.8           | 572                      |
| OFT5              | ACCAATTGACTCTCAGTCGAGA  | ACTCTGAAGTCACAGGTCAGAA  | 60.8           | 428                      |
| OFT6              | ACCTCACATTACCTTCTCCTCC  | AACTACAACAAAGGGAGGCAAG  | 62.7           | 476                      |
| OFT7              | AACCGGAAACATTTAAGGGTC   | GTCCCTTATCTTCAAGAGCTGC  | 60.8           | 404                      |
| OFT8              | AGCTGTTCTCTGTTTGTGTGT   | AAAAACACAGCCAAAGCAATCC  | 58.9           | 696                      |
| OFT9              | GGAGAGACCAGAGGAATCAGAA  | CTTGAAGCAAGGCCAGTGATAT  | 60.8           | 705                      |
| OFT10             | ACTATCCTCACAAATCCCGTCA  | TTCACCCCATAGACAACAGGAT  | 60.8           | 485                      |
| OFT11             | AAGTGTTGACAGATCTGGCAA   | ACTTGTGCTGCTCAAAATGTTG  | 58.9           | 361                      |
| OFT12             | CTCTACCGTACCAAACACACTG  | CTTTGAAGATGGAGGAGGATGC  | 62.7           | 425                      |
| OFT13             | TTCAGACAAAGAAGCCAAGAC   | TACCATCTGAGCCATGAAGGAA  | 60.8           | 739                      |
| OFT14             | AGACCCAGCACAAACCAATAAG  | TGTGGGCTTTGGACTACATTTC  | 60.8           | 294                      |
| OFT15             | TACTATGGATGACTGACCACCC  | GAACATGCTCTTTAGTCCAGGG  | 62.7           | 437                      |
| OFT16             | TGTCTCATCCTGGTGTGTTTTTC | ACCAAATGGTCAGACCTCAAAC  | 60.8           | 259                      |
| OFT17             | TTATCCAACCAAGGCAAACCTGT | AGTGCCATGTTAATGTGCTCA   | 58.9           | 384                      |
| OFT18             | GGAAGAGACAAAGGGAAAGCAA  | AGAGTCAGACACAACCTGAGTGA | 60.8           | 320                      |
| OFT19             | GCACAAAAGGATTTCAATTCGGG | CATCCGTCCATGTAATAGCCTG  | 60.8           | 576                      |
| OFT20             | TATCCCACTTGTCTGGTGTTA   | GAAGTGGGTCCTTGTGCATTTA  | 60.8           | 474                      |
