# Supplementary material for: Development and characterization of type I interferon receptor knockout sheep: A model for viral immunology and reproductive signaling
Source: PubMed Central journal article supplement (PMC9556006; doi:10.3389/fgene.2022.986316), 2022-09-14
Supplement: Table2.pdf [file Table2.pdf]

**Supplemental Table 2:** Housekeeping and ISG primers used for qRT-PCR.

| <b>Housekeeping Genes</b>                 |                                   |                                   |
|-------------------------------------------|-----------------------------------|-----------------------------------|
| <b>Gene</b>                               | <b>Forward Primer (5'-&gt;3')</b> | <b>Reverse Primer (5'-&gt;3')</b> |
| GAPDH                                     | GGAGAAGGCTGGGGCTCAC               | TGCTGACAATCTTGAGGGTATTGT          |
| ACTB                                      | GGCCAACCGTGAGAAGATGA              | CCAGAGGCGTACAGGGACAG              |
| YWHAZ                                     | AGGTGCTGAGAAAAACAGCAGA            | CGTTTGGGATCAAGAACTTTTCC           |
| EIF4A1                                    | GGATTGGCTCACCGAGAAGAT             | CCAGTAGGTCAGTGGTAATCAATACTCTG     |
| <b>Interferon Stimulated Genes (ISGs)</b> |                                   |                                   |
| <b>Gene</b>                               | <b>Forward Primer (5'-&gt;3')</b> | <b>Reverse Primer (5'-&gt;3')</b> |
| MX1                                       | TCCCGACTGTTTACCAAAGTACGA          | GTCCACAGCAGGCTCTTCCA              |
| MX2                                       | AGTTCCTCCATCGTTGAGATTG            | CATCATGGCTTTCTGCACCTTAT           |
| IRF2                                      | GTATGCGGTCCTGACTTCAACTATAA        | CGGTGGTCACCTCCACAACCT             |
| ISG15                                     | CATGATGGTATCCGAGCTGAAG            | CACCTCCCTGCTGTCAAGGT              |
| B2M                                       | GCCAGAAGATGGAAAGCCAA              | TACTGATCCTTGCTGTTGGGAG            |
