# Supplementary material for: Development and characterization of type I interferon receptor knockout sheep: A model for viral immunology and reproductive signaling
Source: PubMed Central journal article supplement (PMC9556006; doi:10.3389/fgene.2022.986316), 2022-09-14
Supplement: Table3.pdf [file Table3.pdf]

**Supplemental Table 3:** Characterization of SFF colonies following targeted disruption of both *IFNAR1* and *IFNAR2*.

| Cell line (Sex) | Targeted Genes                  | No. of Colonies Isolated | Biallelic Disruption of <i>IFNAR1</i> (%) | Biallelic Disruption of <i>IFNAR2</i> (%) | Biallelic Disruption of Both Genes (%) |
|-----------------|---------------------------------|--------------------------|-------------------------------------------|-------------------------------------------|----------------------------------------|
| SFF3 (F)        | <i>IFNAR1</i> and <i>IFNAR2</i> | 268                      | 21 (7.8)                                  | --                                        | 8 (3.0)                                |
| SFF5 (M)        | <i>IFNAR1</i> and <i>IFNAR2</i> | 139                      | --                                        | 31 (22.3)                                 | 18 (12.9)                              |
